# Supplementary material for: Performance and Adsorption Mechanism of Hydrothermal Carbon Modification for Removing Pb2+ from Solution
Source: Preprints.org preprint supplement (doi:10.20944/preprints202310.1887.v1), 2023-10-30
Supplement: Supplementary file 1 [file supplementary]

Archive with 5 entries (5 files):
- 田来鑫.pdf
- 白涛.pdf
- 赵嘉欣.pdf
- 靳智平.pdf
- 张璐明.pdf
